# Supplementary material for: Interstitial Photodynamic Therapy of Glioblastomas: A Long-Term Follow-up Analysis of Survival and Volumetric MRI Data
Source: MDPI journal article supplement (doi:10.3390/cancers15092603), 2023-05-04
Supplement: s1 [file s1]

# Supplementary figures and tables

## Interstitial photodynamic therapy of glioblastoma: An MRI-based follow-up analysis

Foglar, M.; Aumiller, M.; Bochmann, K.; Buchner, A.; El Fahim, M.; Quach, S.; Sroka, R.; Stepp, H.; Thon, N.; Forbrig, R. and Rühm, A.

Supplementary Figure S1

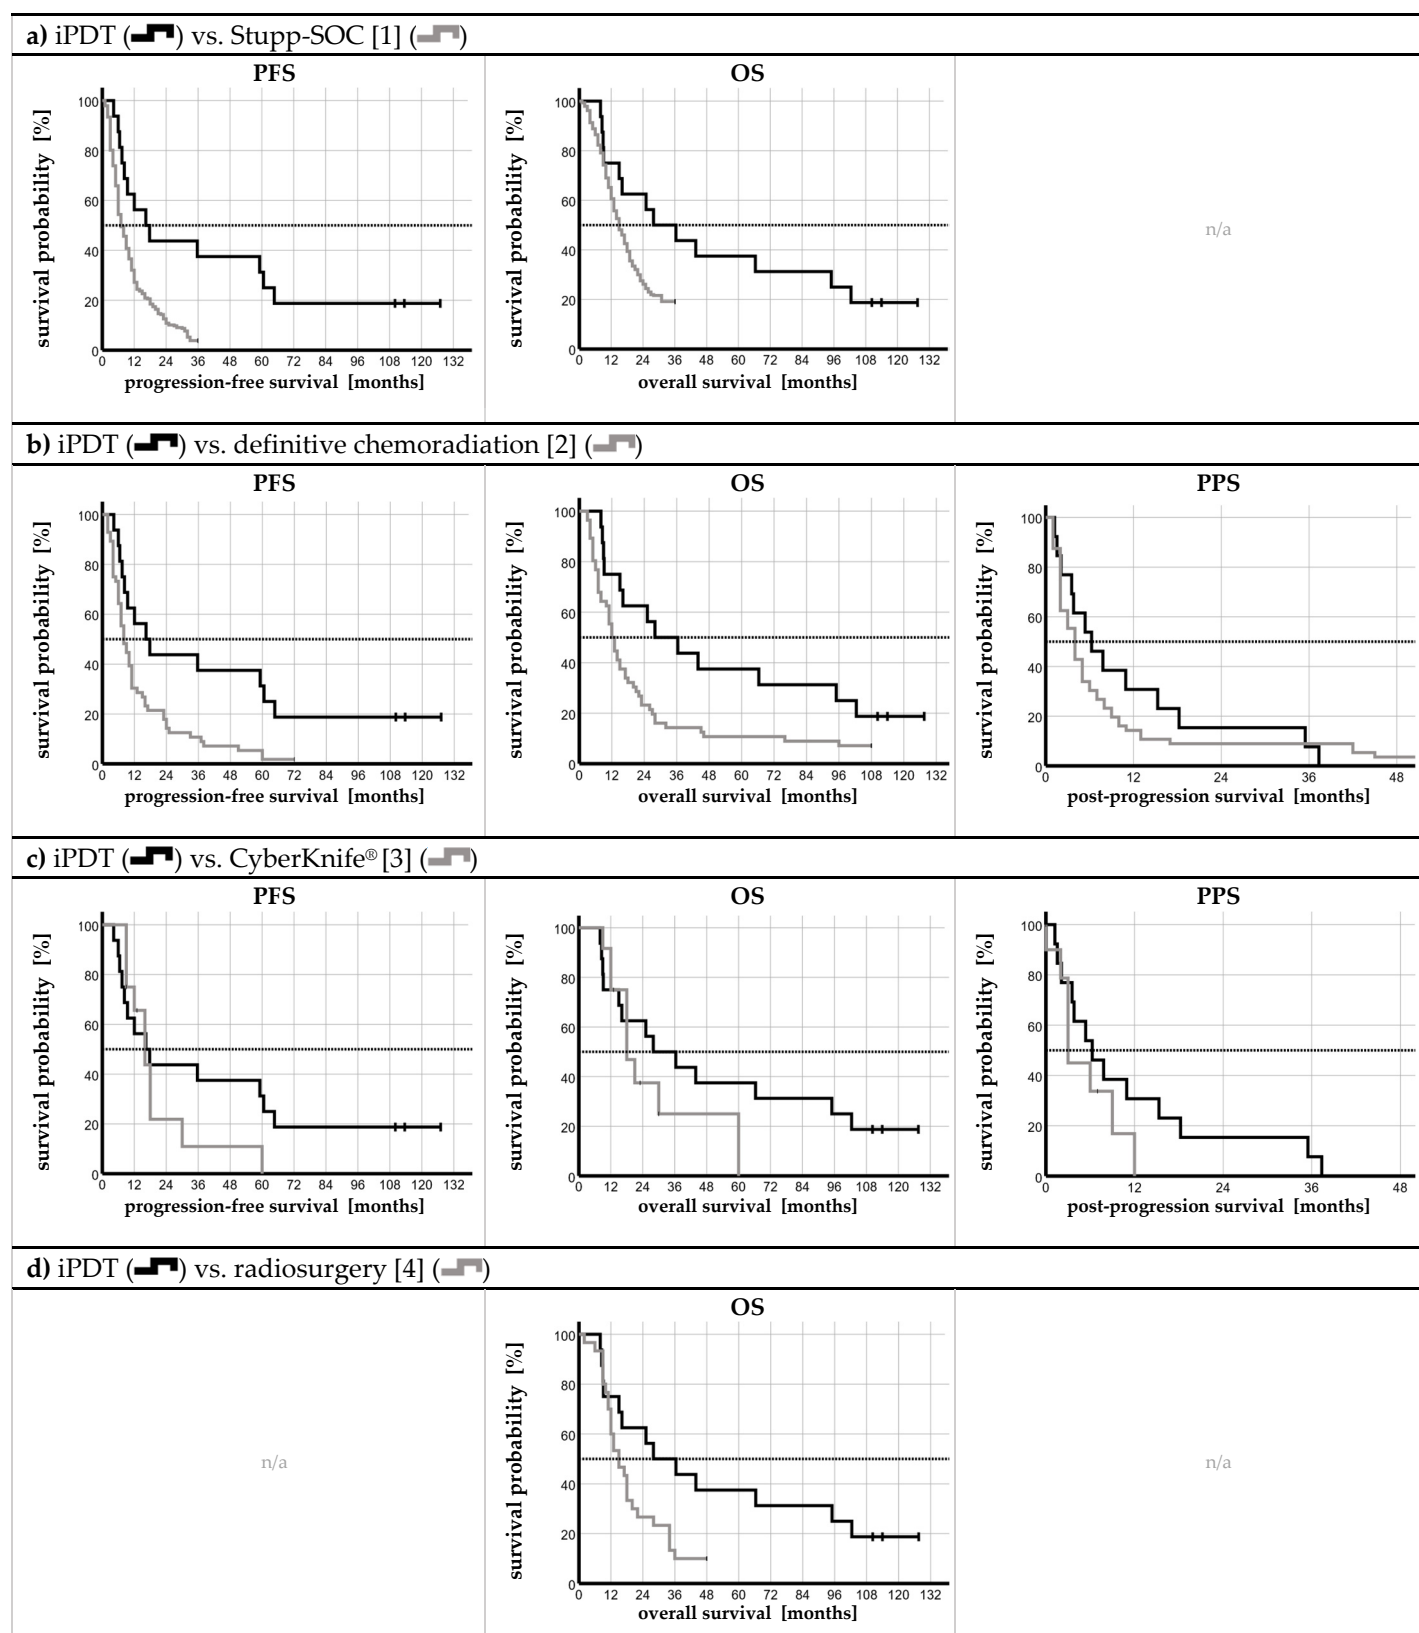

PFS = progression-free survival; OS = overall survival; PPS = post-progression survival

**Supplementary Figure S1:** Kaplan-Meier plots for comparative outcome evaluation of the iPDT-treated patient cohort and patient cohorts receiving other types of treatment. a), b) and d) were reconstructed from published Kaplan-Meier plots, for c) published data were used directly. All graphs marked with “n/a” did not qualify for analysis due to missing data in the original publications.

Supplementary Table S1

| IPDT no.             | tumor<br>pre iPDT  | contrast<br>enhancement<br>pre iPDT | necrosis<br>pre iPDT | NTR<br>pre iPDT                     | contrast<br>enhancement<br>1 day post iPDT | iPDT remnant<br>1 day post iPDT | iPDT remnant<br>3 months post iPDT | iPDT remnant<br>3 months pre recurrence | iPDT remnant<br>at recurrence | recurrent tumor<br>at recurrence |
|----------------------|--------------------|-------------------------------------|----------------------|-------------------------------------|--------------------------------------------|---------------------------------|------------------------------------|-----------------------------------------|-------------------------------|----------------------------------|
| (OS, PFS)            | [mm <sup>3</sup> ] | [mm <sup>3</sup> ]                  | [mm <sup>3</sup> ]   | [mm <sup>3</sup> /mm <sup>3</sup> ] | [mm <sup>3</sup> ]                         | [mm <sup>3</sup> ]              | [mm <sup>3</sup> ]                 | [mm <sup>3</sup> ]                      | [mm <sup>3</sup> ]            | [mm <sup>3</sup> ]               |
| IPDT 01<br>(OS, PFS) | 1678               | 1364                                | 314                  | 0.19                                | 0                                          | 6407                            | n/a                                | n/a                                     | 953                           | 208                              |
| IPDT 02<br>(OS, PFS) | 1362               | 878                                 | 484                  | 0.36                                | 22                                         | 2062                            | 370                                | 305                                     | 157                           | 261                              |
| IPDT 03<br>(PFS)     | 5207               | 2721                                | 2485                 | 0.48                                | 691                                        | 12426                           | n/a                                | n/a                                     | n/a                           | n/a                              |
| IPDT 04<br>(OS, PFS) | 8574               | 7708                                | 865                  | 0.10                                | 347                                        | 43691                           | n/a                                | 12254                                   | 6263                          | 10780                            |
| IPDT 05<br>(OS, PFS) | 2604               | 1592                                | 1013                 | 0.39                                | 387                                        | 22270                           | 3940                               | 4036                                    | 5221                          | 15683                            |
| IPDT 06<br>(OS, PFS) | 1951               | 1834                                | 118                  | 0.06                                | 82                                         | 6381                            | n/a                                | n/a                                     | 3157                          | 2070                             |
| IPDT 07<br>(PFS)     | 2269               | 2059                                | 210                  | 0.09                                | n/a                                        | n/a                             | 6599                               | n/a                                     | n/a                           | n/a                              |
| IPDT 08<br>(OS, PFS) | 4079               | 2819                                | 1260                 | 0.31                                | 535                                        | 11440                           | 3975                               | 2852                                    | 2852                          | 11                               |
| IPDT 09<br>(PFS)     | 14263              | 9644                                | 4619                 | 0.32                                | 0                                          | 66857                           | 20027                              | n/a                                     | n/a                           | n/a                              |
| IPDT 10<br>(OS, PFS) | 6920               | 3827                                | 3093                 | 0.45                                | 2695                                       | 6666                            | 5721                               | 5209                                    | 9131                          | 17177                            |
| IPDT 11<br>(OS, PFS) | 11023              | 5965                                | 5058                 | 0.46                                | 805                                        | 18977                           | 10087                              | n/a                                     | 7335                          | 6165                             |
| IPDT 12<br>(OS, PFS) | 13692              | 12200                               | 1492                 | 0.11                                | 1581                                       | 15241                           | 4742                               | n/a                                     | n/a                           | n/a                              |
| IPDT 13<br>(OS, PFS) | 7176               | 5735                                | 1441                 | 0.20                                | 125                                        | 11552                           | 1277                               | 4975                                    | 4670                          | 5621                             |
| IPDT 14<br>(OS, PFS) | 15335              | 8929                                | 6406                 | 0.42                                | 4720                                       | 22917                           | 8689                               | 5464                                    | 9607                          | 6                                |
| IPDT 15<br>(OS, PFS) | 3990               | 3239                                | 750                  | 0.19                                | 569                                        | 8833                            | 5448                               | 3548                                    | 2994                          | 13197                            |
| IPDT 16<br>(OS, PFS) | 21825              | 12362                               | 9463                 | 0.43                                | 4054                                       | 31773                           | 14935                              | 1625                                    | 2335                          | 8557                             |

PFS = OS = progression-free survival; OS = † = overall survival; n/a = MR imaging not available; 0 = volume was not present; NTR = Necrosis-tumor ratio  
**Supplementary Table S1:** Individual tumor-related volumes and volume ratios (values rounded to full mm<sup>3</sup>, suppl. for **Table 5**)

## Supplementary Table S2

|                                                                      | in relation to | p-value | HR    | 95 % CI         |
|----------------------------------------------------------------------|----------------|---------|-------|-----------------|
| <b>a)</b> age at diagnosis [years]                                   | OS             | 0.067   | 1.038 | [0.997; 1.080]  |
| <b>b)</b> cycles of TMZ [n]                                          | OS             | 0.146   | 0.859 | [0.700; 1.055]  |
| <b>c)</b> NTR [mm <sup>3</sup> /mm <sup>3</sup> ]                    | OS             | 0.540   | 0.279 | [0.005; 16.533] |
| <b>d)</b> PPS [months]                                               | PFS            | 0.053   | 0.938 | [0.879; 1.001]  |
| <b>e)</b> tumor volume [cm <sup>3</sup> ]                            | OS             | 0.653   | 1.020 | [0.935; 1.112]  |
| <b>f)</b> CE volume 24h post-iPDT [cm <sup>3</sup> ]                 | OS             | 0.599   | 1.096 | [0.779; 1.541]  |
| <b>g)</b> iPDT remnant 24h post-iPDT [cm <sup>3</sup> ]              | OS             | 0.401   | 0.986 | [0.954; 1.019]  |
| <b>h)</b> iPDT remnant 3 months post-iPDT [cm <sup>3</sup> ]         | OS             | 0.341   | 0.946 | [0.845; 1.060]  |
| <b>i)</b> iPDT remnant 3 months before recurrence [cm <sup>3</sup> ] | OS             | 0.051   | 1.318 | [0.998; 1.740]  |
| <b>k)</b> iPDT remnant at recurrence [cm <sup>3</sup> ]              | OS             | 0.156   | 1.144 | [0.950; 1.377]  |
| <b>l)</b> presence of CE 3 months post-iPDT [yes; no]                | OS             | 0.223   | 2.259 | [0.610; 8.363]  |
| <b>m)</b> MGMT-status [yes/partially; no]                            | OS             | 0.042   | 0.280 | [0.082; 0.956]  |

HR = hazard ratio; **a) – k)**: HR per step in unit listed; **l) – m)**: HR by category

**Supplementary Table S2:** Univariate Cox regression analysis for possibly survival-related factors displayed in Figures 4 to 6

## Supplementary Table S3

|          |           | Stupp [1]        |                   | Chemoradiation [2] |                   | CyberKnife® [3]  |                   | Stereotactic radiosurgery [4] |                   |
|----------|-----------|------------------|-------------------|--------------------|-------------------|------------------|-------------------|-------------------------------|-------------------|
|          |           | published values | calculated values | published values   | calculated values | published values | calculated values | published values              | calculated values |
| PFS      | median    | 6.9              | 7.0               | 8.1                | 8.0               | 16               | 16.0              | 8.2                           | n/a               |
| [months] | [95 % CI] | [5.8; 8.2]       | [6.1; 7.9]        | [n/a; n/a]         | [5.6; 10.4]       | [n/a; n/a]       | [10.4; 21.6]      | [4.6; 10.5]                   |                   |
| OS       | median    | 14.6             | 15.0              | 12.1               | 12.0              | 18               | 18.0              | 14.8                          | 15.0              |
| [months] | [95 % CI] | [13.2; 16.8]     | [13.3; 16.7]      | [n/a; n/a]         | [9.6; 14.4]       | [n/a; n/a]       | [10.9; 25.1]      | [10.9; 19.9]                  | [9.6; 20.4]       |
| PPS      | median    | n/a              | n/a               | 3.4                | 4.0               | n/a              | 3.0               | n/a                           | n/a               |
| [months] | [95 % CI] |                  |                   | [n/a; n/a]         | [3.0; 5.0]        |                  | [2.0; 4.0]        |                               |                   |

PFS = progression-free survival; OS = overall survival; PPS = post-progression survival

**Supplementary Table S3:** Survival times (median, [95 % CI]) for different treatments reported in literature, with comparison of published values and re-calculated values based on digitized Kaplan-Meier graphs (values rounded)

## References

1. Stupp, R., et al., *Radiotherapy plus concomitant and adjuvant temozolomide for glioblastoma*. N Engl J Med, 2005. **352**(10): p. 987-96.
2. Thon, N., et al., *Outcome in unresectable glioblastoma: MGMT promoter methylation makes the difference*. J Neurol, 2017. **264**(2): p. 350-358.
3. Oermann, E., et al., *CyberKnife enhanced conventionally fractionated chemoradiation for high grade glioma in close proximity to critical structures*. J Hematol Oncol, 2010. **3**: p. 22.
4. Azoulay, M., et al., *A phase I/II trial of 5-fraction stereotactic radiosurgery with 5-mm margins with concurrent temozolomide in newly diagnosed glioblastoma: primary outcomes*. Neuro Oncol, 2020. **22**(8): p. 1182-1189.
